# Supplementary material for: Biological Thermal Performance of Organic and Inorganic Aerogels as Patches for Photothermal Therapy
Source: MDPI journal article supplement (doi:10.3390/gels8080485), 2022-08-03
Supplement: s1 [file s1]

## Supporting Information

### Biological thermal performance of organic and inorganic aerogels as patches for photothermal therapy

Tânia Ferreira-Gonçalves <sup>1,2</sup>, Ana Iglesias-Mejuto <sup>3</sup>, Teresa Linhares <sup>4,5</sup>, João M. P. Coelho <sup>2</sup>, Pedro Vieira <sup>6</sup>, Pedro Faísca <sup>7</sup>, José Catarino <sup>8</sup>, Pedro Pinto <sup>1</sup>, David Ferreira <sup>9</sup>, Hugo A. Ferreira <sup>2</sup>, Maria Manuela Gaspar <sup>1</sup>, Luísa Durães <sup>4</sup>, Carlos A. García-González <sup>3</sup> and Catarina Pinto Reis <sup>1,2,\*</sup>

<sup>1</sup> Research Institute for Medicines (iMed.Ulisboa), Faculty of Pharmacy, Universidade de Lisboa, Av. Professor Gama Pinto, 1649-003 Lisboa, Portugal; taniag1@edu.ulisboa.pt (T.F.-G.); pfc Pinto@ff.ulisboa.pt (P.P.); mgaspar@ff.ulisboa.pt (M.M.G.)

<sup>2</sup> Instituto de Biofísica e Engenharia Biomédica, Faculdade de Ciências, Universidade de Lisboa, Campo Grande, 1749-016 Lisboa, Portugal; jmcoelho@fc.ul.pt (J.M.P.C.); hugoferreira@campus.ul.pt (H.A.F.)

<sup>3</sup> I+D Farma Group (GI-1645), Department of Pharmacology, Pharmacy and Pharmaceutical Technology, Faculty of Pharmacy, iMATUS and Health Research Institute of Santiago de Compostela (IDIS), Universidade de Santiago de Compostela, E-15782 Santiago de Compostela, Spain; ana.iglesias.mejuto@rai.usc.es (A.I.-M.); carlos.garcia@usc.es (C.A.G.-G.)

<sup>4</sup> University of Coimbra, CIEPQPF, Department of Chemical Engineering, 3030-790 Coimbra, Portugal; tcalin-hares@gmail.com (T.L.); luisa@eq.uc.pt (L.D.)

<sup>5</sup> 2C2T-Centre for Textile Science and Technology, University of Minho, Campus of Azurém, 4800-058, Guimarães, Portugal.

<sup>6</sup> Physics Department, NOVA School of Science and Technology (Campus de Caparica), 2829-516 Caparica, Portugal; pmv@fct.unl.pt (P.V.)

<sup>7</sup> CBIOS-Research Center for Biosciences & Health Technologies, Universidade Lusófona de Humanidades e Tecnologias, Campo Grande 376, 1749-024 Lisboa, Portugal; pedrofaisca@ulusofona.pt (P.F.)

<sup>8</sup> Faculdade de Medicina Veterinária, Universidade Lusófona de Humanidades e Tecnologias, Campo Grande 376, 1749-024 Lisboa, Portugal; p5663@ulusofona.pt (J.C.)

<sup>9</sup> Comprehensive Health Research Centre (CHRC), Departamento de Desporto e Saúde, Escola de Saúde e Desenvolvimento Humano, Universidade de Évora, Largo dos Colegiais, 7004-516 Évora, Portugal; david.ferreira@uevora.pt (D.F.)

\* Correspondence: catarinareis@ff.ulisboa.pt; Tel.: +351-217-946-429 (ext. 14244); Fax: +351-217-946-470

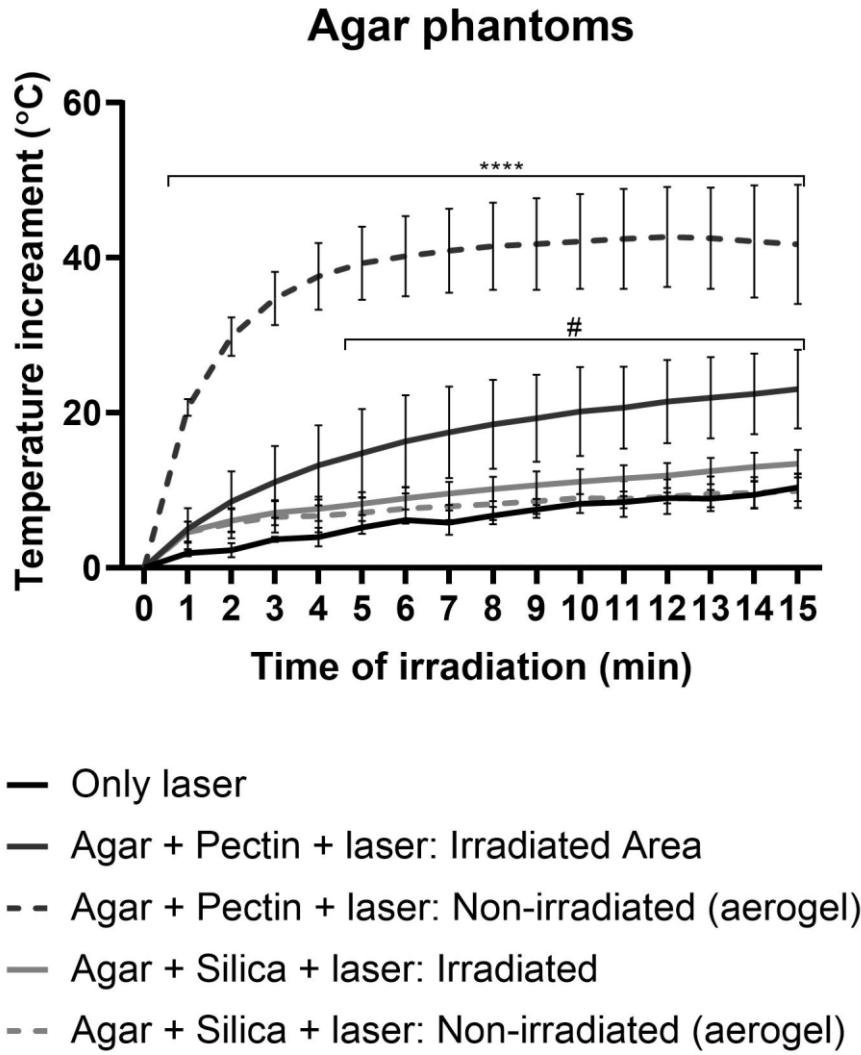

**Figure S1:** Temperature increment observed for agar phantoms throughout laser irradiation with a NIR laser. Statistical significance represents \*\*\*\*  $p < 0.0001$  compared with all the other testing groups and #  $p < 0.05$  compared with all the other groups except the group irradiated on top of a pectin aerogel: non-irradiated area (corresponds to the aerogel temperature).

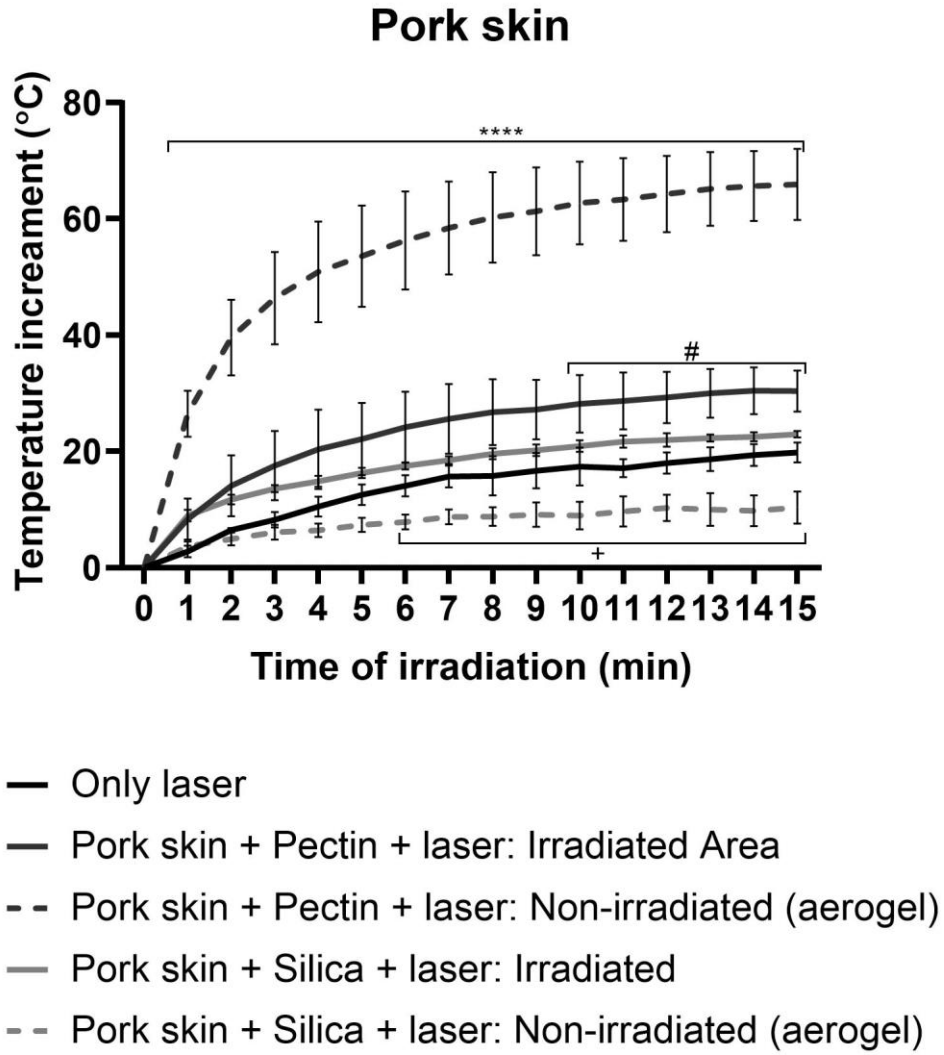

**Figure S2:** Temperature increment observed for pig skin ex vivo grafts throughout laser irradiation with a NIR laser. Statistical significance represents \*\*\*\*  $p < 0.0001$  compared with all the other testing groups; #  $p < 0.05$  compared with Only laser group, and +  $p < 0.05$  compared with groups directly irradiated from both aerogels.

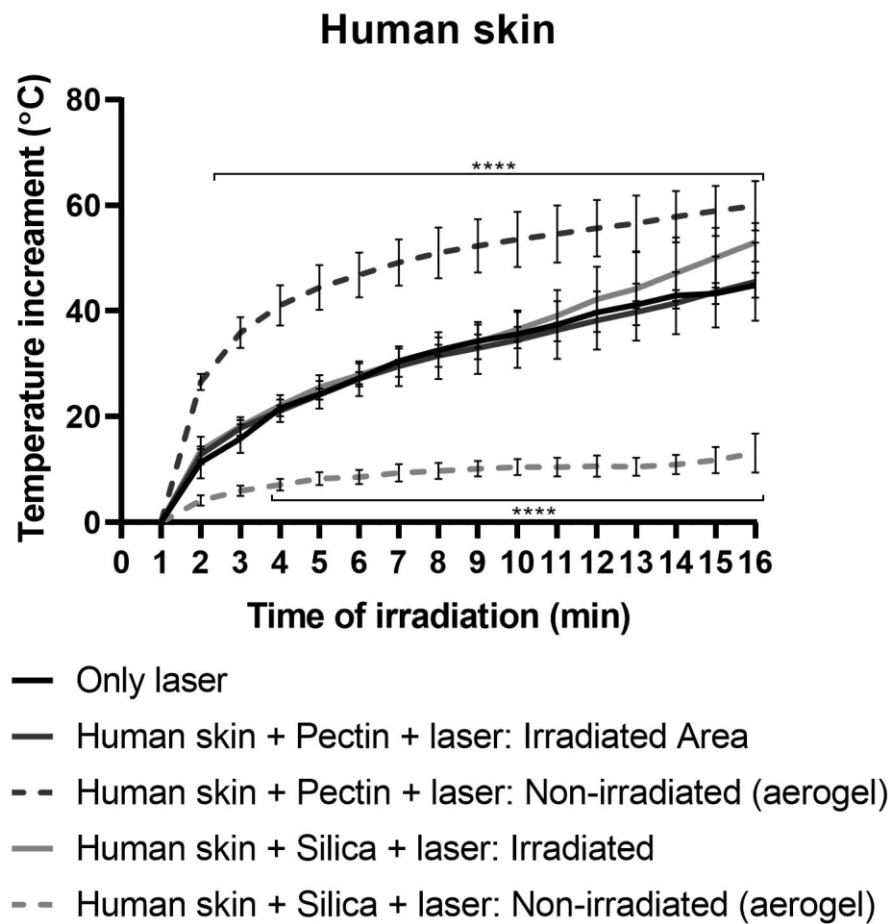

**Figure S3:** Temperature increment observed for human skin ex vivo grafts throughout laser irradiation with a NIR laser. Statistical significance represents \*\*\*\*  $p < 0.0001$  compared with all the other testing groups.

**Table S1.** Summarized results from skin compatibility tests.

| <b>Aerogel Material</b>     | <b>Control time after patch removal</b> | <b>Type of reaction<sup>1</sup></b> | <b>Mean daily irritation score (Mdis)<sup>2</sup></b> | <b>% of reactive subjects</b> |
|-----------------------------|-----------------------------------------|-------------------------------------|-------------------------------------------------------|-------------------------------|
| <b>Pectin-based aerogel</b> | 15 min                                  | None                                | 0                                                     | 0                             |
|                             | 24 h                                    | None                                | 0                                                     | 0                             |
|                             | 48 h                                    | None                                | 0                                                     | 0                             |
| <b>Silica-based aerogel</b> | 15 min                                  | None                                | 0                                                     | 0                             |
|                             | 24 h                                    | None                                | 0                                                     | 0                             |
|                             | 48 h                                    | None                                | 0                                                     | 0                             |

<sup>1</sup> A dermatologist evaluated the skin conditions looking for any visible signs of reactivity such as erythema, oedema, vesicle, bulla, papule or scab. <sup>2</sup> Individual daily irritation score is primarily calculated for each individual ( $I_{dis}$ ) based on the sum of marks attributed to visible signs depending on their intensity: erythema, oedema, vesicle, papule (from 1 to 2 or 3) and bulla, scab (2 if present). Then, the mean daily irritation score ( $M_{dis}$ ) was calculated according  $M_{dis} = \sum (I_{dis}) / \text{number of subjects}$ .
